MS ID#: MEDRXIV/2020/195099

MS TITLE: Early Release Estimates for SARS-CoV-2 Prevalence and Antibody Response Interim Weighting for Probability-Based Sample Surveys

### **Authors**

\*Heather Bradley, Assistant Professor, Georgia State University School of Public Health

\*Mansour Fahimi, Chief Data Scientist, Marketing Systems Group

Travis Sanchez, Research Associate Professor, Emory University Rollins School of Public Health

Ben Lopman, Professor, Emory University Rollins School of Public Health

Martin Frankel, Professor Emeritus, Baruch College, City University of New York

Colleen F. Kelley, Associate Professor, Emory University School of Medicine

Richard Rothenberg, Professor, Georgia State University School of Public Health

Aaron J Siegler, Associate Professor, Emory University Rollins School of Public Health

Patrick S Sullivan, Professor, Emory University Rollins School of Public Health

(\*Co-first authors)

The authors have withdrawn this manuscript because analytic strategies for this project have changed. Therefore, the authors do not wish this work to be cited as reference for the project. If you have any questions, please contact the corresponding author.
